# Supplementary material
Source: Springer Nature journal article supplement (https://www.springermedizin.de/resource/supplementary/13047_2013_570_MOESM5_ESM.pdf/9663994)
Supplement: MOESM5 [file 9663994]

# ACUTE CHARCOT PATHWAY OF CLINICAL CARE

## Clinical signs/symptoms:

- Localised unilateral swelling
- Erythema
- Warmth
- +/- Pain (50%)
- +/- Deformity (IV)

*Urgent referral to multidisciplinary high-risk foot service (EO)*

## Clinical assessments: Using Charcot assessment and management form

- Hx of trauma (25% of cases) (III-2) or recent surgery (IV)
- Long standing diabetes (85% >10 years duration) (II)
- Peripheral neuropathy (unable to detect 10g monofilament) (III)
- Bounding pulses evident by palpation or with doppler ultrasound (where obscured by concurrent oedema) (III)
- Infrared dermal thermometry comparisons: >2.0°C between contra-lateral corresponding locations using infrared dermal thermometer accurate to ±0.1°C, i.e. DermaTemp (IV)

## Clinical management:

*Immediate immobilisation (IV)*

1. Total contact cast (TCC) (IV) *or*
2. Irremovable walker (i-TCC) with offloading insole (IV) *or*
3. Removable walker with offloading insole (IV) (*only* if TCC or i-TCC are deemed inappropriate)

*Considerations: Ulcer, infection, deformity, falls risk, frequency of reviews, and/or poor adherence (IV)*

## Imaging referrals:

- Weight bearing x-ray (IV)

### Conclusive x-ray:

*(Bony consolidation, fragmentation of subchondral bone, fractures, dislocation/subluxation, osteopenia, osteolysis) (IV)*

- Record joint/s involved

### Inconclusive x-ray:

Where clinical diagnosis remains inconclusive, further diagnostics investigations may be required to establish a diagnosis and exclude other possible causes (III)

# ACUTE CHARCOT PATHWAY OF CLINICAL CARE

## Confirmed acute Charcot dx:

Clinical signs/symptoms/±hx +  
>2°C temperature difference at corresponding locations +  
Conclusive diagnostic imaging findings (IV)

## Management:

- Continue immobilisation (IV)
  - Initial TCC to be removed and re-casted after 3/7 due to significant reduction in swelling (IV)
- Education (EO)
- Ensure contra-lateral footwear is appropriate with offloading orthotic to prevent bilateral Charcot (IV)
- Oedema control if removable walker is used (EO)
- Review 1-2/52 to: (EO)
  - Re-assess infrared dermal temperatures
  - Re-cast TCC/re-assess walker fit
- Periodic follow-up x-rays as required (EO)

## Referrals: (EO)

- Referral to multidisciplinary high-risk foot service
- If diabetes control suboptimal, refer to GP or endocrinology to be optimised
- OT referral for home safety assessment

## Negative acute Charcot dx

*Continue with immobilisation management until a definitive diagnosis is made (EO)*

## Potential ddx:

- Infection (osteomyelitis, cellulitis, abscess, deep tissue infection)
- Neuropathic/traumatic fracture
- DVT → refer for duplex vein scan
- Acute gout
- Inflammatory arthritis (III-2)

**Average management time:** 2-12 months (II)

## Foot remains unstable and/or non-responsive to immobilisation:

- Referral to multidisciplinary high-risk foot service or orthopaedics for surgical review (IV)
- Consider bisphosphonates infusions (II)

## Confirmed chronic Charcot dx:

Clinical signs/symptoms completely resolved  
+  
<2°C temperature difference at corresponding locations  
for 4-6 consecutive weeks  
+  
Weight bearing x-ray confirming remodelling phase and  
to assess chronic deformity (IV)  
*(Healed fractures, sclerosis of bone, absorption of bony debris, fusion and rounding of large fragments, increased bone density)*

## Long-term management:

- Gradual step down to partial weight bearing as required, i.e. aircast walker (IV)
- Footwear/Offloading (IV)
  - **Nil deformity:** Appropriate footwear + offloading orthotics
  - **Moderate deformity:** Custom footwear + offloading orthotics
  - **Severe deformity ± Charcot location IV or V:** CROW ± referral to multidisciplinary high-risk foot service or orthopaedics for surgical review
- Education (EO)
- Physiotherapy referral for muscle strengthening (EO)
- 3-monthly podiatry reviews of 'high-risk' patient to monitor reactivation of acute Charcot (20-30% of cases) (IV)
